# Supplementary material for: β-Ga2O3: ultralow-loss and low-permittivity dielectric ceramic for high-frequency packaging substrate
Source: Royal Society of Chemistry journal article supplement (doi:10.1039/d3qi00578j), 2023-01-01
Supplement: d3qi00578j1.pdf [file d3qi00578j1.pdf]

## SUPPORTING INFORMATION

### $\beta$ -Ga<sub>2</sub>O<sub>3</sub>: Ultralow loss and low permittivity dielectric ceramics for high-frequency packaging substrate

Received 00th January 20xx,  
 Accepted 00th January 20xx

DOI: 10.1039/x0xx00000x

Wei Wang,<sup>a</sup> Chao Du,<sup>a</sup> Xin Wang,<sup>a</sup> DiMing Xu,<sup>\*a</sup> Hong-Song Qiu,<sup>b</sup> Biao-Bing Jin,<sup>b</sup> Zhong-Qi Shi,<sup>c</sup> Fayaz Hussain,<sup>d</sup> Moustafa Adel Darwish,<sup>e</sup> Tao Zhou,<sup>f</sup> Ya-Wei Chen,<sup>g</sup> Qi-Xin Liang,<sup>g</sup> Mei-Rong Zhang<sup>g</sup> and Di Zhou<sup>\*a</sup>

Table S1. Refined structural parameters and Wyckoff positions of the Ga<sub>2</sub>O<sub>3</sub> ceramic.

| Refined Structural parameters | Lattice parameters |              |              |             |                                        | Reliability factors       |                          |          |
|-------------------------------|--------------------|--------------|--------------|-------------|----------------------------------------|---------------------------|--------------------------|----------|
|                               | <i>a</i> (Å)       | <i>b</i> (Å) | <i>c</i> (Å) | $\beta$ (°) | <i>V<sub>m</sub></i> (Å <sup>3</sup> ) | <i>R<sub>wp</sub></i> (%) | <i>R<sub>p</sub></i> (%) | $\chi^2$ |
|                               | 12.2279(6)         | 3.0399(1)    | 5.8071(1)    | 103.848(1)  | 209.58(2)                              | 5.263                     | 3.537                    | 3.43     |
| Wyckoff positions             | Atom               | <i>x</i>     | <i>y</i>     | <i>z</i>    | Site                                   | <i>U<sub>iso</sub></i>    |                          |          |
|                               | Ga1                | 0.0903(5)    | 0            | 0.7946(1)   | 4 <i>i</i>                             | 0.003                     |                          |          |
|                               | Ga2                | 0.1584(8)    | 0.5          | 0.3138(2)   | 4 <i>i</i>                             | 0.003                     |                          |          |
|                               | O1                 | 0.1651(8)    | 0            | 0.1091(1)   | 4 <i>i</i>                             | 0.011                     |                          |          |
|                               | O2                 | 0.1727(2)    | 0            | 0.5654(4)   | 4 <i>i</i>                             | 0.002                     |                          |          |
|                               | O3                 | -0.0044(9)   | 0.5          | 0.2581(9)   | 4 <i>i</i>                             | 0.009                     |                          |          |

<sup>a</sup> Key Laboratory of Multifunctional Materials and Structures, Ministry of Education, School of Electronic Science and Engineering, Xi'an Jiaotong University, Xi'an 710049, Shaanxi, China.

<sup>b</sup> Research Institute of Superconductor Electronics (RISE), School of Electronic Science and Engineering, Nanjing University, Nanjing 210093, Jiangsu, China.

<sup>c</sup> State Key Laboratory for Mechanical Behaviour of Materials, Xi'an Jiaotong University, Xi'an 710049, Shaanxi, China.

<sup>d</sup> Department of Materials Engineering, NED University of Engineering & Technology, Karachi 75270, Pakistan.

<sup>e</sup> Physics Department, Faculty of Science, Tanta University, Al-Geish st., Tanta 31527, Egypt.

<sup>f</sup> School of Electronic and Information Engineering, Hangzhou Dianzi University, Hangzhou 310018, Zhejiang, China.

<sup>g</sup> Shenzhen Microgate Technology Co., Ltd., Shenzhen 518118, Guangdong, China.

†Electronic Supplementary Information (ESI) available. See DOI: 10.1039/x0xx00000x

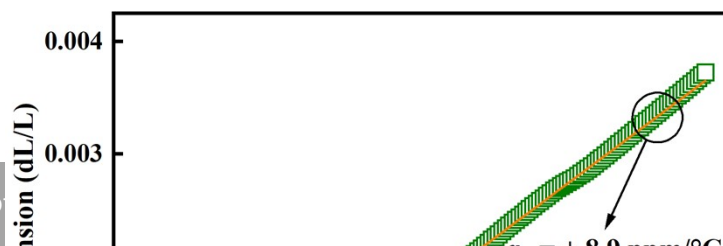

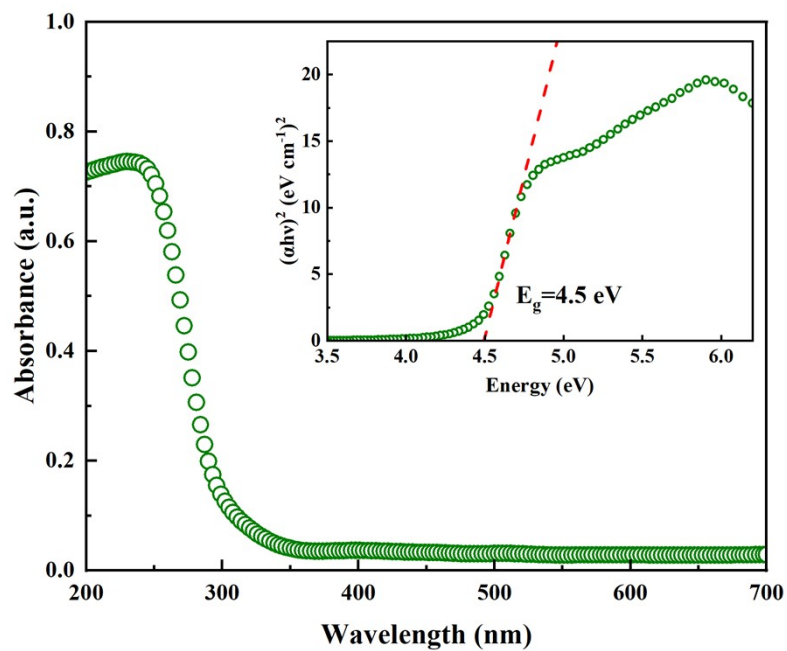

Figure S2. UV-vis diffuse-reflection absorption spectra of the Ga<sub>2</sub>O<sub>3</sub> ceramic. The inset was direct optical band gap obtained by the Tauc plot method.
